# Supplementary material
Source: publisher site journal article supplement (https://www.spandidos-publications.com/405/downloadSupplementary)

Figure S1. Sensitivity analysis of SAS and SAS-VCR cells to 5-FU and cisplatin. (A) Cells were treated with the indicated concentrations of 5-FU for 48 h (n=3). (B) Cells were exposed to the indicated concentrations of cisplatin for 24 h (n=5). Cell viability was examined by an MTT assay. Data are presented as the mean  $\pm$  SEM. \*P<0.05 vs. SAS cells. VCR, vincristine; 5-FU, 5-fluorouracil.

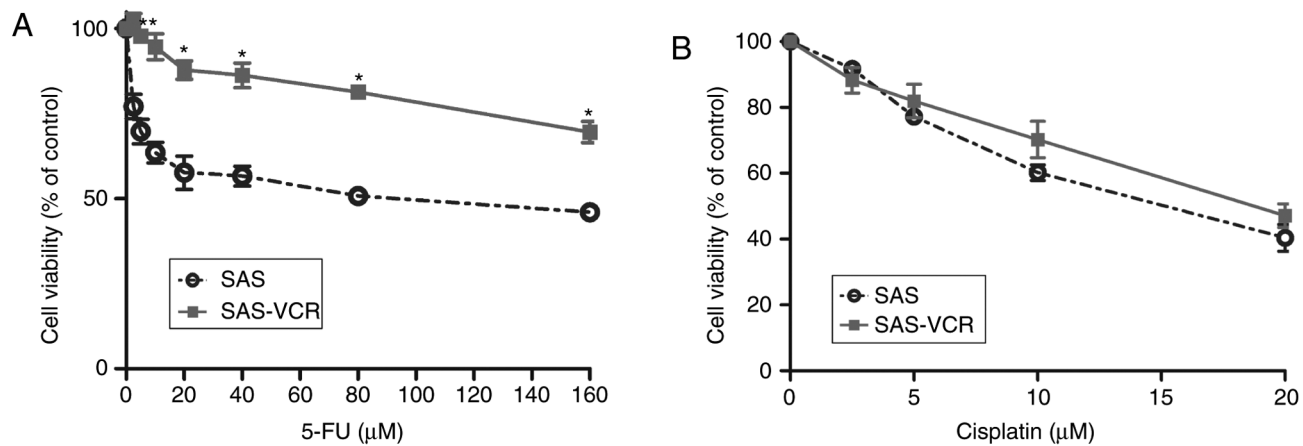

Supplement: Supplementary file 1 [file downloadSupplementary]
